# Supplementary material for: Exploring glycated sites in human serum albumin: impact of sample processing techniques on detection and analysis
Source: Royal Society of Chemistry journal article supplement (doi:10.1039/d4ay00503a), 2024-01-01
Supplement: d4ay00503a1.pdf [file d4ay00503a1.pdf]

## Supporting Information for

### Exploring Glycated Sites in Human Serum Albumin: Impact of Sample Processing Techniques on Detection and Analysis

Namita Kumari,<sup>\*a</sup> Madhumati S Vaishnav<sup>a,b</sup> Sathyanarayana Srikanta<sup>b</sup> P. R. Krishnaswamy<sup>a</sup> and Navakanta Bhat<sup>a</sup>

<sup>a</sup> Centre for Nano Science and Engineering, Indian Institute of Science, Bengaluru 560012, India

<sup>b</sup> Samatvam Endocrinology Diabetes Center, Jnana Sanjeevini Diabetes Hospital and Medical Center, Bengaluru, India

**Table S1** The serum sample details (HbA1c, serum albumin concentration and % GA).

| Sample | % HbA1c | % GA | Albumin (g/dL) |
|--------|---------|------|----------------|
| 1      | 5.7     | 19.7 | 4.4            |
| 2      | 7       | 20.9 | 4.8            |
| 3      | 5.8     | 24.1 | 4.1            |
| 4      | 7.5     | 26.9 | 4.4            |
| 5      | 9.7     | 27.9 | 4.4            |
| 6      | 11.2    | 31.1 | 4.2            |
| 7      | 9.9     | 33.9 | 3.8            |
| 8      | 10.4    | 34.4 | 4.2            |
| 9      | 8.1     | 35.8 | 3.9            |
| 10     | 12.1    | 39.5 | 4.4            |
| 11     | 14      | 41.8 | 4.2            |
| 12     | 16.3    | 50.3 | 4.3            |
| 13     | 18.1    | 51.4 | 4.1            |
| 14     | 15.9    | 53   | 3.7            |
| 15     | 17.7    | 53.8 | 4.2            |
| 16     | 15.6    | 62.3 | 3.2            |

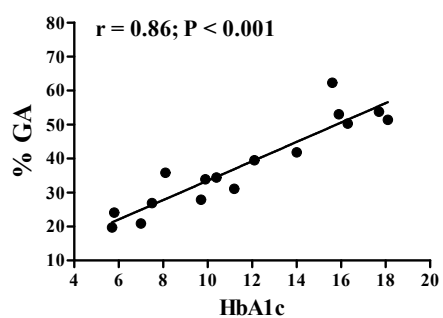

**Fig. S1** Scatter plot and regression analysis representing the correlation between % GA with HbA1c (N = 16).

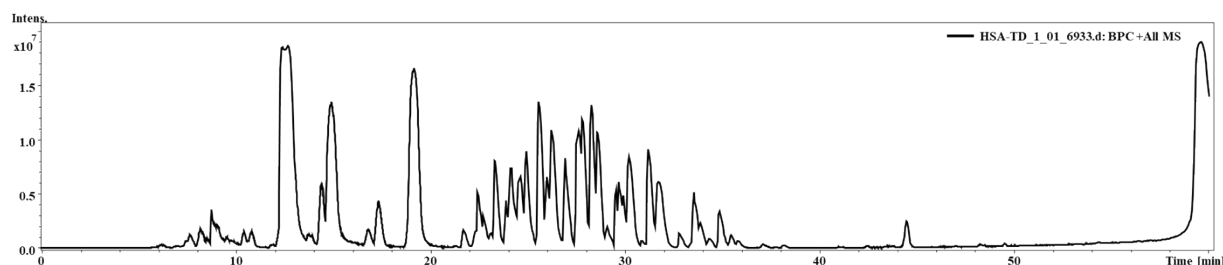

**Fig. S2** The LC-MS chromatogram of trypsin digested HSA (Sigma).

**Table S2.** The list of tryptic peptides detected from the HSA (Sigma) indicating their sequence, retention time and observed MS and MS/MS charge states.

| No | PEPTIDE (Sequence)                 | Observed MS (Charge)    | MS/MS (Charge) | Rt (min)    |
|----|------------------------------------|-------------------------|----------------|-------------|
| 1  | DAHK (1-4)                         | 470.2 (1+)              |                | 6.8 - 7.3   |
| 2  | SEVAHR (5-10)                      | 698.3 (1+)              |                | 9.3 - 9.7   |
| 3  | DLGEENFK (13 - 20)                 | 476.21(2+)              | 476.21(2+)     | 26.3        |
| 4  | ALVLIIFAQYLQQCPFEDHVK (21 - 41)    | 830.74 (3+)             | 830.74 (3+)    | 33.8        |
| 5  | LVNEVTEFAK (42 - 51)               | 575.29 (2+)             | 575.29 (2+)    | 27.4        |
| 6  | TCVADESAENCDK (52 - 64)            | 749.75 (2+)             | 749.75 (2+)    | 22.3        |
| 7  | SLHTLFGDK (65-73)                  | 509.25 (2+)             | 509.25 (2+)    | 27.5        |
| 8  | LCTVATLR (74 - 81)                 | 467.27 (2+)             | 467.27 (2+)    | 26.4        |
| 9  | ETYGEMADCCAK (82 - 93)             | 717.78 (2+)             | 717.78 (2+)    | 25          |
| 10 | QEPERNECFLQHK (94 - 106)           | 572.28 (3+)             | 572.28 (3+)    | 24.1        |
| 11 | DDNPNLPR (107 - 114)               | 470.74 (2+)             | 470.74 (2+)    | 24.1        |
| 12 | LVRPEVDVMCTAFHDNEETFLK (115 - 136) | 663.58 (4+)             | 663.58 (4+)    | 29.4        |
| 13 | YLIEIAR (138-144)                  | 464.26 (2+)             | 464.26 (2+)    | 27.8        |
| 14 | HPYFYAPELFFAK(146 - 159)           | 581.98 (3+)             | 581.98 (3+)    | 32.8        |
| 15 | YK (161 - 162)                     | 310.1 (1+)              | 310.1 (1+)     | 8 - 9.3     |
| 16 | AAFTECCQAADK (163 - 174)           | 686.29 (2+)             | 686.29 (2+)    | 24.2        |
| 17 | LDELRDEGK (182 - 190)              | 537.78 (2+)             | 537.78 (2+)    | 23.3        |
| 18 | ASSAK (191-195)                    | 463.2 (1+)              | 464.75 (1+)    | 7.4         |
| 19 | QR (196 - 197)                     | 303.1 (1+)              |                | 9.8-11.1    |
| 20 | LK (198-199)                       | 260.2 (1+)              |                | 8 - 9.6     |
| 21 | FGER (206 - 209)                   | 508.2 (1+)              |                | 21.4 - 22.3 |
| 22 | AFK (210-212)                      | 365.2 (1+)              |                | 12.9-14.2   |
| 23 | AWAVAR (213 - 218)                 | 673.37 (1+); 337.2 (2+) |                | 25.4-26.2   |
| 24 | LSQR (219 - 222)                   | 503.3 (1+); 252.1 (2+)  | 503.3 (1+)     | 10.5        |
| 25 | AEFAEVSK (226 - 233)               | 440.71 (2+)             | 440.71 (2+)    | 24.8        |
| 26 | LVTDLTK (234-240)                  | 395.22 (2+)             | 395.22 (2+)    | 26.1        |
| 27 | VHTECCHGDLLECADDR (241 - 257)      | 696.62 (3+)             | 696.62 (3+)    | 25.2        |
| 28 | ADLAK (258 - 262)                  | 259.16(2+); 517.31 (1+) | 517.31 (1+)    | 13.9        |
| 29 | YICENQDSISSK (263 - 274)           | 722.33 (2+)             | 722.33 (2+)    | 24.2        |

|    |                                       |                                          |                             |             |
|----|---------------------------------------|------------------------------------------|-----------------------------|-------------|
| 30 | LKECCEKPLEK (275 - 286 )              | 773.91 (2+); 516.28 (3+);<br>387.46 (4+) | 773.91 (2+);<br>516.28 (3+) | 23.8        |
| 31 | SHCIAEVENDEMPADLPSLAADFVESK (287-307) | 992.43 (3+)                              | 992.43 (3+)                 | 31.6        |
| 32 | DVCK (308 - 311)                      | 521.25 (1+)                              | 521.25 (1+)                 | 10.5        |
| 33 | NYEAK (318 - 323)                     | 695.35 (1+); 348.18 (2+)                 | 695.35 (1+)                 | 17          |
| 34 | DVFLGMFLYEYAR (324 - 336)             | 812.41 (2+)                              | 812.41 (2+)                 | 34.9        |
| 35 | RHPDYSVVLLL (337 - 348)               | 489.96 (3+)                              | 489.96 (3+)                 | 29.2        |
| 36 | TYETTLEK (352 - 359)                  | 492.76 (2+)                              | 492.76 (2+)                 | 24.6        |
| 37 | CCAAADPHECYAK (360 - 372)             | 519.54 (3+)                              | 519.54 (3+)                 | 22.6        |
| 38 | VFDEFKPLVEEQNLK (373 - 389)           | 682.71 (3+)                              | 682.71 (3+)                 | 30.1        |
| 39 | QNCLEFQLGEYK (390 - 402)              | 553.26 (3+)                              | 553.26 (3+)                 | 29.6        |
| 40 | FQNALLVR (403 - 410)                  | 960.58 (1+); 480.80 (2+)                 | 480.80 (2+)                 | 28.3        |
| 41 | YTK (411 - 413)                       | 411.24 (1+)                              | 411.24 (1+)                 | 9.4         |
| 42 | KVPQVSTPTLVEVSR (414-428)             | 820.48 (2+)                              | 820.48 (2+)                 | 27          |
| 43 | NLGK (429 - 432)                      | 431.27 (1+)                              | 431.27 (1+)                 | 10.9        |
| 44 | VGSK (433 - 436)                      | 390.23 (1+)                              |                             | 7.1 - 8.3   |
| 45 | CCK (437 - 439)                       | 467.18 (1+)                              | 467.18 (1+)                 | 7.6         |
| 46 | HPEAK (440 - 444)                     | 581.31 (1+)                              | 581.31 (1+)                 | 7.6         |
| 47 | MPCAEDYLSVVLNQLCVLHEK (446-466)       | 840.08 (3+); 630.31 (4+)                 | 840.08 (3+);<br>630.31 (4+) | 33.5        |
| 48 | TPVSDR (467 to 472)                   | 673.39 (1+); 337.2 (2+)                  |                             | 25.9 - 26.4 |
| 49 | VTK (473-475)                         | 347.22 (1+)                              |                             | 7.1 - 7.8   |
| 50 | CCTESLVNR (476-484)                   | 569.76 (2+)                              | 569.76 (2+)                 | 24.6        |
| 51 | RPCFSALEVDETYVVK (485-500)            | 637.65 (3+)                              | 637.65 (3+)                 | 28.1        |
| 52 | EFNAETFTFHADICTLSEK (501-519)         | 754.36 (3+)                              | 754.36 (3+)                 | 29.9        |
| 53 | QIK (522 - 524)                       | 388.27 (1+)                              |                             | 9.8 - 10.8  |
| 54 | QTALVELVK (526-534)                   | 500.82 (2+)                              | 500.82 (2+)                 | 28.6        |
| 55 | ATK (539 - 541)                       | 319.21 (1+)                              |                             | 7.1 - 7.3   |
| 56 | EQLK (542 - 545)                      | 517.31 (1+)                              |                             | 12.2 - 12.6 |
| 57 | AVMDDFAAFVEK (546-557)                | 671.83 (2+)                              | 671.83 (2+)                 | 31.1        |
| 58 | CCK (558 - 560)                       | 467.18 (1+)                              | 467.18 (1+)                 | 7.6         |
| 59 | ADDK (561 - 564)                      | 448.21 (1+)                              | 448.21 (1+)                 | 7.4         |
| 60 | KLVAASQAALGL (574-585)                | 571.36 (2+)                              | 571.36 (2+)                 | 28.7        |

1 DAHKSEVAHR FKDLGEENFK ALVLIAFAQY LQQCPFEDHV KLVNEVTEFA  
51 KICVADESAE NCDKSLHTLF GDKLCTVAIL RETYGEMADC CAKQEPERNE  
101 CFLQHKDDNP NLPRLVRPEV DVMCTAFHDN EETFLKLYLY EIARRHPYFY  
151 APELLFFAKR YKAAFTECCQ AADKAACLLP KLDEL RDEGK ASSAKQRLKC  
201 ASLQKFGERA FKAWAVARLS QRFPKAEFAE VSKLVTDLTK VHTECCHGDL  
251 LECADDRADL AKYICENQDS ISSKLKECCE KPLLEKSHCI AEVENDEMPA  
301 DLPSLAADFV ESKDVCKNYA EAKDVFLGMF LYEYARRHPD YSVVLLLR LA  
351 KTYETTLEKC CAAADPHECY AKVFDEFKPL VEEPQNLIKQ NCELFEQLGE  
401 YKFQNALLVR YTKKVPQVST PTLVEVSRNL GKVGSKCCKH PEAKRMPCAE  
451 DYLSVVLNQL CVLHEKTPVS DRVTKCCTES LVNRRPCFSA LEVDETYVVK  
501 EFNAETFTFH ADICTLSEK E RQIKKQ TALV ELVKHKPKAT KEQLKAVMDD  
551 FAAFVEKCCK ADDKETCFAE EGK KLVAASQ AALGL

**Fig. S3** The peptide sequence detected in the tryptic digest of HSA (Sigma); peptides detected with MS/MS confirmation is marked yellow and green, the peptides with only MS confirmation are indicated blue color fonts (two different shades indicate two different peptides), whereas the red colored peptide sequence could not be detected.

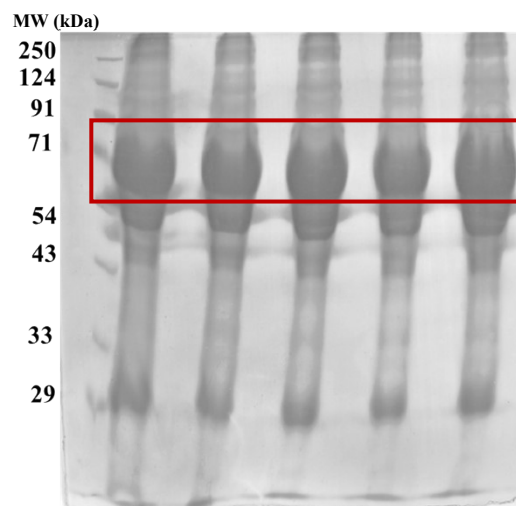

**Fig. S4** SDS-PAGE gel electrophoresis of five serum samples (% GA = 62.3, 53, 50, 41.8, 34.4) for isolating albumin (circle indicating the albumin band) from other serum proteins.

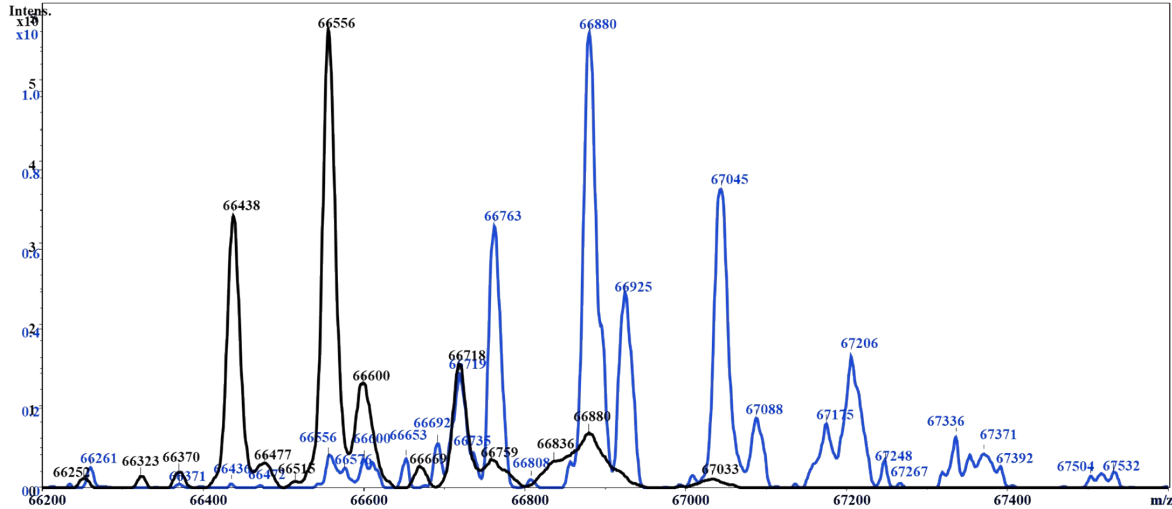

**Fig. S5** Overlay of mass spectrum of LGA (less glycated, black) and MGA (more glycated, blue) of the serum sample (% GA = 41.8). Deconvolution has been done using the maximum entropy algorithm.

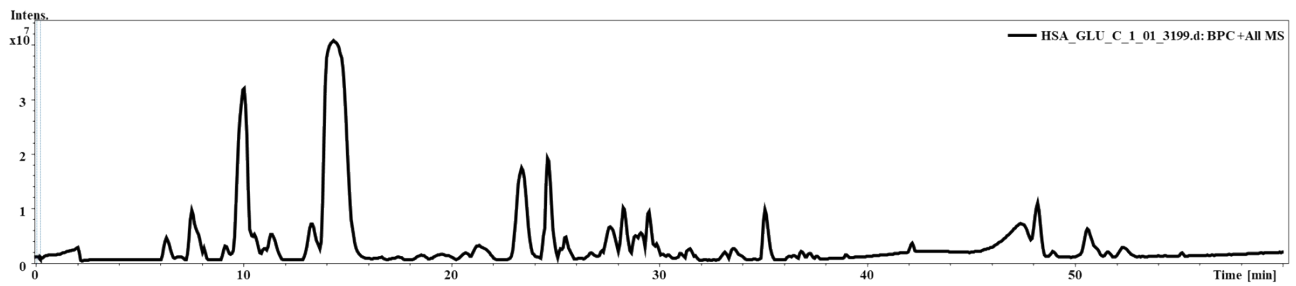

**Fig. S6** The LC-MS chromatogram of Glu-C digested HSA (Sigma).

1 DAHKSEVAHR FKDLGEE<sup>1</sup>NFK ALVLIAFAQY LQQCPFEDHV KLVNE<sup>2</sup>VTEFA  
51 KTCVADE<sup>3</sup>SAE NCDKSLHTLF GDKLCTVATL RETYGE<sup>4</sup>MADC CAKQEPERNE  
101 CFLQHKDDNP NLPRLVRPEV<sup>5</sup> DVMCTAFHDN EETFLKKYLY EIARRHPYFY  
151 APELLFFAKR YKAAFT<sup>6</sup>ECCQ AADKAACLLP KLDEL<sup>7</sup>RDEGK ASSAKQRLKC  
201 ASLQKFGERA FKAWAVARLS QRFPAE<sup>8</sup>FAE VSKLVTDLTK VHTE<sup>9</sup>CCHGDL  
251 LECADDRADL AKYICEN<sup>10</sup>QDS ISSKLKE<sup>11</sup>CCE KPLLEKSHCI AEVENDEMPA  
301 DLPSLAADFV ESKDVCKNYA EAKDVFLGMF<sup>12</sup> LYEYARRHPD YSVVLLRLA  
351 KTYE<sup>13</sup>TTLKCAAAADPHECY AKVFDE<sup>14</sup>FKPL VEEPQNLIKQ NCELFEQLGE  
401 YKFQNALLRV YTKKVPQVST PTLVE<sup>15</sup>VSRNL GKVGSKCKKH PEAKRMPCAE  
451 DYLSVVLNQL CVLHE<sup>16</sup>KTPVS DRVTKCCTES LVNRRPCFSA LEVDE<sup>17</sup>TYVPK  
501 EFNAE<sup>18</sup>TFTFH ADICTLSEKE RQIKKQ<sup>19</sup>TALV ELVKHKPKAT KEQLKAVMDD  
551 FAAFVE<sup>20</sup>KCKC ADDKETCFAE EGK<sup>21</sup>KLVAASQ AALGL

**Fig. S7** The peptide sequence detected in the Glu-C digest of HSA (Sigma); peptides detected with MS/MS confirmation is marked yellow and green, the peptides with only MS confirmation are indicated blue color fonts, whereas the red colored peptide sequence could not be detected.

**Table S3.** The list of peptides detected from the Glu-C digest of HSA (Sigma) indicating their sequence, retention time and observed MS and MS/MS charge states.

|    | PEPTIDE (Sequence)                   | MS (Charge)                                           | MS/MS (Charge)                          | Rt (min)       |
|----|--------------------------------------|-------------------------------------------------------|-----------------------------------------|----------------|
| 1  | DAHKSE (1-6)                         | 686.31(1+); 343.65 (2+)                               | 686.31(1+); 343.65 (2+)                 | 6.6            |
| 2  | VAHRFKDLGEE (7 – 17)                 | 650.83 (2+); 434.22 (3+)                              | 650.83 (2+); 434.22 (3+)                | 24.5           |
| 3  | NFKALVLIFAQYLQQPFEDHVKLVNE (18 – 45) | 1112.25(2+); 834.69(3+);<br>667.95(4+)                | 1112.25(2+); 834.69(3+);<br>667.95(4+)  | 36.4           |
| 4  | VTE (46 - 48)                        | 348.17 (1+)                                           |                                         | 8.8 –<br>10.2  |
| 5  | FAKTCVADE (49 – 57)                  | 1040.47 (1+); 520.74 (2+)                             | 520.74 (2+)                             | 21.8           |
| 6  | SAE (58 – 60)                        | 306.12 (1+)                                           | 306.12 (1+)                             | 8.1            |
| 7  | NCDKSLHTLFGDKLCTVATLRE (61 – 82)     | 1289.64(2+); 860.09(3+);<br>645.32 (4+)               | 645.57 (4+)                             | 30.5           |
| 8  | TYGE (83 – 86)                       | 469.19 (1+)                                           | 469.19 (1+)                             | 10.5           |
| 9  | MADCCAKQEPERNE (87 – 100)            | 869.35 (2+); 579.90 (3+)                              | 869.35 (2+)                             | 10.2           |
| 10 | CFLQHKDDNPPLRVRPE (101 – 119)        | 1174.58 (2+); 783.40 (3+);<br>587.8 (4+); 470.44 (5+) | 587.8 (4+); 470.44 (5+)                 | 28.4           |
| 11 | VDVMCTAFHDNEE (120 – 132)            | 783.80 (2+); 522.87 (3+)                              | 783.80 (2+)                             | 29.9           |
| 12 | TFLKKYLYE (133 – 141)                | 602.83 (2+); 402.32 (3+)                              | 602.83 (2+); 402.32 (3+)                | 29.8           |
| 13 | IARRHPYFYAPE (142 – 153)             | 760.39 (2+); 507.26 (3+);<br>380.70 (4+)              | 760.39 (2+); 507.26 (3+)                | 27.7           |
| 14 | LLFFAKRYKAAAFTE (154 – 167)          | 852.97 (2+); 568.98 (3+);<br>426.99 (4+)              | 568.98 (3+); 426.99 (4+)                | 31.3           |
| 15 | CCQAADKAAACLLPKLDE (168 – 184)       | 654.97 (3+)                                           |                                         | 30.2-<br>30.4  |
| 16 | LRDE (185 - 188)                     | 532.27(1+)                                            | 532.27(1+)                              | 8.8            |
| 17 | RAFKAWAVARLSQRFPKAE (209 – 227)      | 558.81 (4+); 447.25 (5+)                              |                                         | 28.6-<br>28.9  |
| 18 | FAE (228 - 230)                      | 366.16 (1+)                                           | 366.16 (1+)                             | 17             |
| 19 | VSKLVTDLTKVHTE (231 – 244)           | 785.44 (2+); 523.96(3+);<br>393.22 (4+)               | 785.44 (2+); 523.96(3+);<br>393.22 (4+) | 28.1           |
| 20 | CCHGDLLE (245 – 252)                 | 1003.39 (1+); 502.20 (2+)                             | 502.20 (2+)                             | 28             |
| 21 | CADDRADLAKYICE (253 – 266)           | 567.25 (3+)                                           | 567.25 (3+)                             | 29.7           |
| 22 | NQDSISSKLKE (267 – 277)              | 624.82 (2+); 416.88 (3+)                              | 624.82 (2+); 416.88 (3+)                | 24.6           |
| 23 | SKDVCKNYAE (312 – 321)               | 607.28 (2+); 405.18 (3+)                              |                                         | 10.1 -<br>10.4 |
| 24 | AKDVFLGMFLYE (322 – 333)             | 716.86 (2+)                                           | 716.86 (2+)                             | 36.7           |
| 25 | YARRHPDYVLLLLRLAKTYE (334 – 354)     | 641.60 (4+); 513.48 (5+)                              | 641.60 (4+); 513.48 (5+)                | 32.5           |
| 26 | TTLE (355 – 358)                     | 463.23 (1+)                                           | 463.23 (1+)                             | 15             |
| 27 | KCCAAADPHECYAKVFDE (359 – 376)       | 724.30 (3+); 543.47 (4+)                              |                                         | 28 - 28.4      |
| 28 | FKPLVEEPQNLIKQNCE (377 – 393)        | 1043.53 (2+); 696.02 (3+);<br>522.27 (4+)             | 696.02 (3+)                             | 30             |

|    |                                       |                          |                          |      |
|----|---------------------------------------|--------------------------|--------------------------|------|
| 29 | LFEQLGE (394 – 400)                   | 835.42 (1+); 418.21 (2+) | 835.42 (1+); 418.21 (2+) | 31.6 |
| 30 | YKFQNALLVRYTKKVPQVSTPTLVE (401 – 425) | 731.41 (4+); 585.33 (5+) | 585.33 (5+)              | 30.2 |
| 31 | AKRMPCAE (443 – 450)                  | 481.73 (2+)              | 481.73 (2+)              | 10.1 |

|    | Glycated Lysine residue      | PEPTIDE (Sequence)     | MS (Charge)                               | MS/MS (Charge)              | Rt (min)    |
|----|------------------------------|------------------------|-------------------------------------------|-----------------------------|-------------|
| 1  | K-12                         | VAHRFKDLGEE            | 1300.6 (1+); 650.8 (2+);<br>434.2(3+)     | 650.8 (3+);<br>434.2(3+)    | 26.1        |
| 2  | K-64                         | NCDKSLHTLFGDKLCTVATLRE | 914.11(3+); 685.84 (4+);<br>548.87 (5+)   | 548.87 (5+)                 | 31          |
| 3  | K-136/K-137                  | TFLKKLYE               | 1366.71 (1+); 683.86<br>(2+); 456.24 (3+) | 683.86 (2+);<br>456.24(3+)  | 30.4        |
| 4  | K-159/K-162                  | LLFFAKRYKAAFTE         | 934.0 (2+); 623.00 (3+);<br>467.5 (4+)    | 467.5 (4+)                  | 31.4        |
| 5  | K-233                        | VSKLVTDLTKVHTE         | 866.47 (2+); 577.98<br>(3+); 433.74 (4+)  | 577.98 (3+)                 | 29          |
| 6  | K-276                        | NQDSISSKLKE            | 705.85 (2+); 470.9 (3+)                   | 705.85 (2+);<br>470.9 (3+)  | 26.4        |
| 7  | K-313                        | SKDVCKNYAE             | 688.3 (2+); 459.2 (3+)                    |                             | 10.1 - 10.6 |
| 8  | K-323                        | AKDVFLGMFLYE           | 797.89 (2+)                               |                             | 36.1 -36.5  |
| 9  | K-351                        | YARRHPDYSVLLLLRLAKTYE  | 909 (3+); 682.12 (4+);<br>545.9 (5+)      | 682.12 (4+);<br>545.9 (5+)  | 32.9        |
| 10 | K-359                        | KCCAAADPHE             | 660.76 (2+)                               |                             | 9.5 - 10.0  |
| 11 | K-378/K-389                  | FKPLVEEPQNLKQNC        | 1124.56 (2+); 750.04<br>(3+); 567.78 (4+) |                             | 30.5 - 30.8 |
| 12 | K-475                        | KTPVSDRVTKCCTE         | 921.93 (2+); 614.95 (3+)                  |                             | 10.1 - 10.9 |
| 13 | K-525                        | RQIKKQTALVE            | 783.43 (2+); 492.62 (3+)                  | 783.43 (2+);<br>492.62 (3+) | 12.7        |
| 14 | K-545                        | QLKAVMDDFAAFVE         | 873.42 (2+); 582.61 (3+)                  | 582.61 (3+)                 | 35.1        |
| 15 | K-564                        | KCKKADDKE              | 658.28 (2+); 439.18 (3+)                  | 439.18 (3+)                 | 5.8         |
| 16 | K-574                        | GKKLVAASQAALGL         | 774.9 (2+); 496.96 (3+)                   | 774.9 (2+);<br>496.96 (3+)  | 29.9        |
| 32 | DYLSVVLNQLCVLHE (451 – 465)  |                        | 901.46 (2+); 601.30 (3+)                  | 901.46 (2+); 601.30 (3+)    | 37          |
| 33 | KTPVSDRVTKCCTE (466 – 479)   |                        | 840.9 (2+); 560.94 (3+);<br>420.95 (4+)   |                             | 10 - 10.6   |
| 34 | SLVNRPCFSALE (480 – 492)     |                        | 774.90 (2+); 516.93 (3+)                  | 516.93 (3+)                 | 29.6        |
| 35 | VDE (493 – 495)              |                        | 362.16 (1+)                               | 362.16 (1+)                 | 9.4         |
| 36 | TYVPKEFNAE (496 – 505)       |                        | 599.29 (2+)                               | 599.29 (2+)                 | 28.3        |
| 37 | TFTFHADICTLSE (506 – 518)    |                        | 771.35 (2+)                               | 771.35 (2+)                 | 32          |
| 38 | TFTFHADICTLSEKE (506 – 520)  |                        | 899.9 (2+); 600.28 (3+)                   | 600.28 (3+)                 | 30.7        |
| 39 | RQIKKQTALVE (521 – 531)      |                        | 657.39 (2+); 438.60 (3+)                  | 438.60 (3+)                 | 10.3        |
| 40 | LVKHKPKATKE (532 – 542)      |                        | 639.89 (2+); 426.93 (3+)                  | 639.89 (2+)                 | 6.4         |
| 41 | QLKAVMDDFAAFVE (543 – 556)   |                        | 792.39 (2+); 528.59 (3+)                  | 792.39 (2+); 528.59 (3+)    | 35.1        |
| 42 | KCKKADDKETCF AEE (557 – 571) |                        | 945.35 (2+); 630.57 (3+)                  |                             | 10 - 10.6   |
| 43 | TCFAEE (567 – 571)           |                        | 756.28 (1+)                               | 756.28 (1+)                 | 26.4        |
| 44 | GKKLVAASQAALGL (572 – 585)   |                        | 663.91 (2+); 442.94 (3+)                  | 663.91 (2+); 442.94 (3+)    | 29.4        |

**Table S4.** The list of peptides detected from the Glu-C digest of glycated HSA (with 100 mM glucose for 28 days) indicating their sequence, retention time and observed MS and MS/MS charge states.

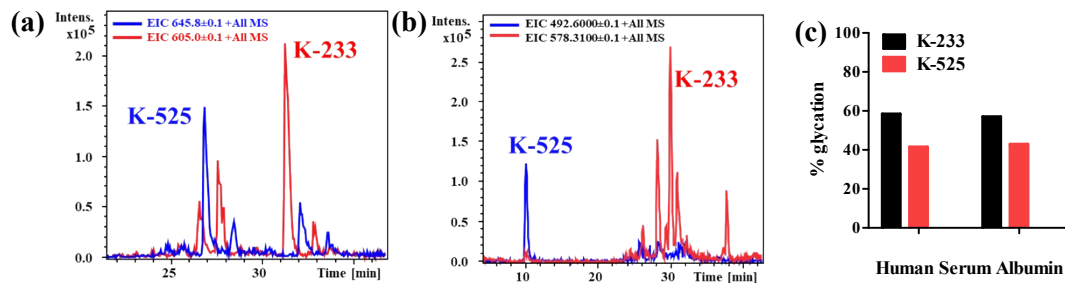

**Fig. S8.** (a) Overlaid extracted ion chromatogram of glycosylated lysine residue [K-525, K\*QTALVELVK, MH<sup>+</sup> = 1290.69; m/z = (645.8)<sup>2+</sup> and K-233, AEFAEVSK\*LVTDLTK, MH<sup>+</sup> = 1812.89; m/z = (605.0)<sup>3+</sup>] from the tryptic digest of HSA (b) Overlaid extracted ion chromatogram of glycosylated lysine residue [K-525, RQIKK\*QTALVE, MH<sup>+</sup> = 1475.79; m/z = (492.60)<sup>3+</sup> and K-233, VSKLVTDLTK\*VHTE, MH<sup>+</sup> = 1731.88; m/z = (578.0)<sup>3+</sup>] from the Glu C digest of HSA (c) The relative extent of glycation at two lysine residues (K-525 and K-233) in human serum albumin after the in-solution proteolytic digestion using trypsin and Glu-C enzymes.
